# Supplementary material
Source: MDPI journal article supplement (https://www.mdpi.com/2673-4079/1/3/20)
Supplement: s1 [file s1]

## Supporting information

### Title: One-Pot and Metal-Free Synthesis of Dimethyl Carbonate From CO<sub>2</sub> at Room Temperature

Santosh Govind Khokarale, Thai Quoc Bui and Jyri-Pekka Mikkola

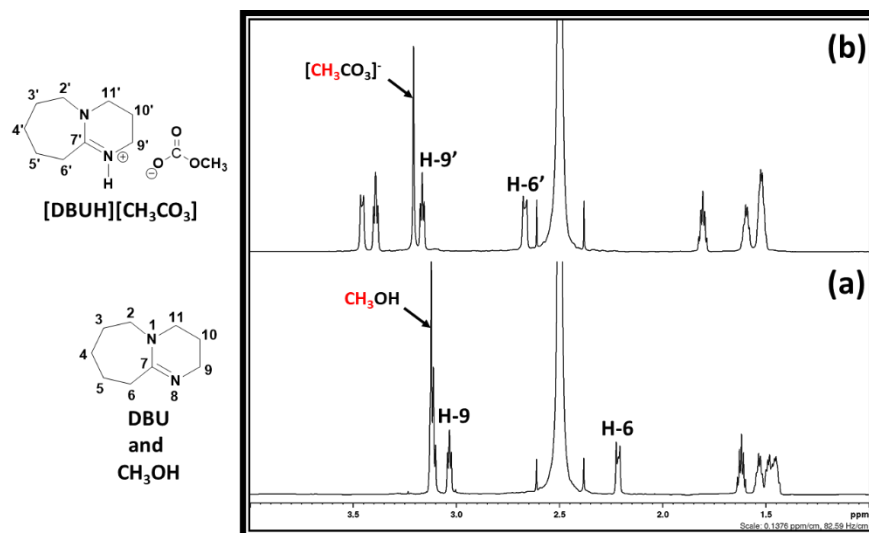

**Figure S1.** <sup>1</sup>H NMR spectra of (a) DBU and methanol and (b) [DBUH][CH<sub>3</sub>CO<sub>3</sub>] (NMR analysis with D<sub>2</sub>O capillary).

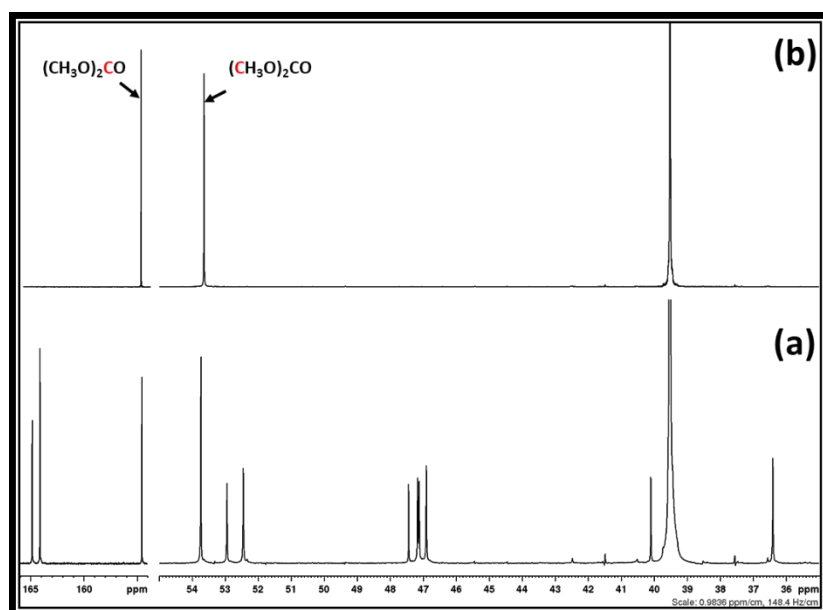

**Figure S2:** <sup>13</sup>C NMR spectra of the (a) reaction mixture after addition of 1 equivalents of CH<sub>3</sub>I in DMSO solution of [DBUH][CH<sub>3</sub>CO<sub>3</sub>] and (b) commercially available DMC (NMR analysis with D<sub>2</sub>O capillary).

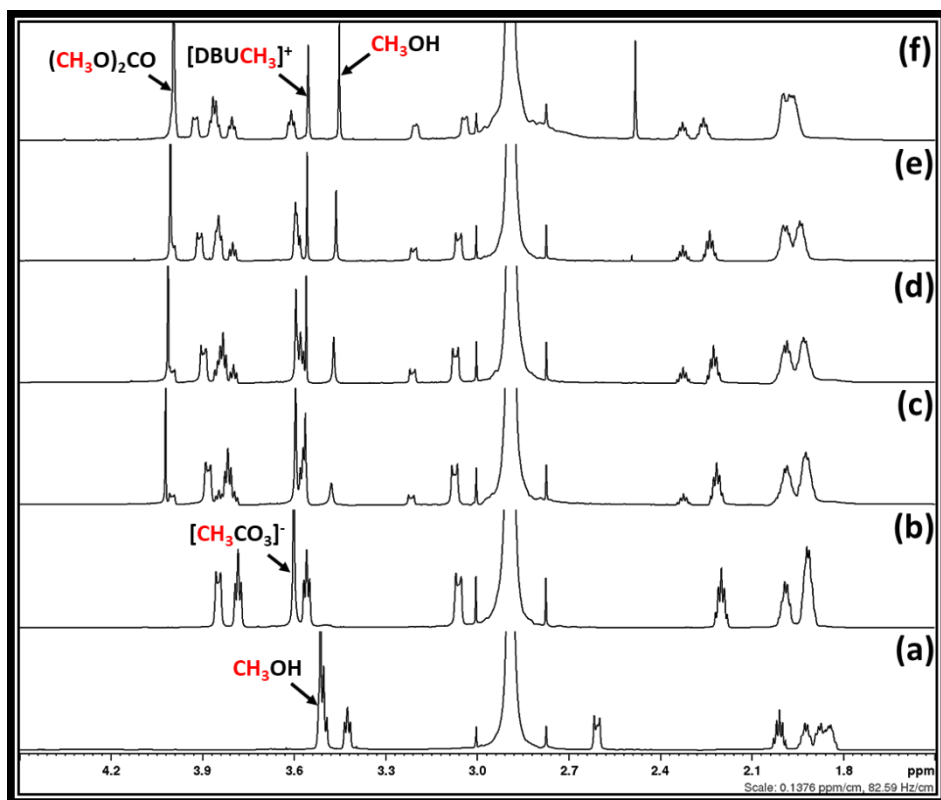

**Figure S3.**  $^1\text{H}$  NMR spectra for the synthesis of DMC from  $[\text{DBUH}][\text{MeCO}_3]$  and  $\text{CH}_3\text{I}$  in DMSO. (a) DBU and methanol, (b)  $[\text{DBUH}][\text{CH}_3\text{CO}_3]$ , reaction mixture after addition of (c) 0.25, (d) 0.50, (e) 0.75, and (f) 1 equivalents of  $\text{CH}_3\text{I}$  in DMSO solution of  $[\text{DBUH}][\text{CH}_3\text{CO}_3]$  (NMR analysis with  $\text{D}_2\text{O}$  capillary).

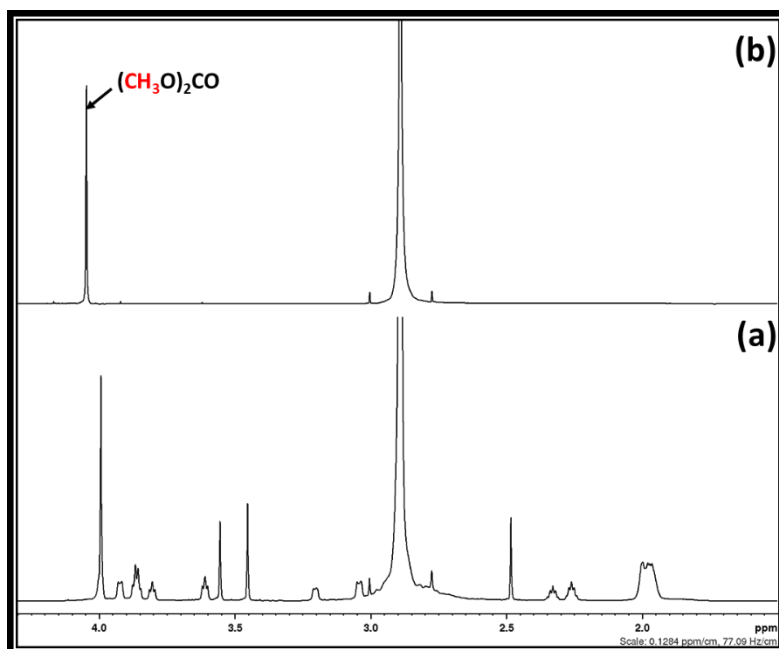

**Figure S4.**  $^1\text{H}$  NMR of the (a) reaction mixture after addition of 1 equivalent of  $\text{CH}_3\text{I}$  in DMSO solution of  $[\text{DBUH}][\text{CH}_3\text{CO}_3]$  and (b) commercially available DMC (NMR analysis with  $\text{D}_2\text{O}$  capillary).

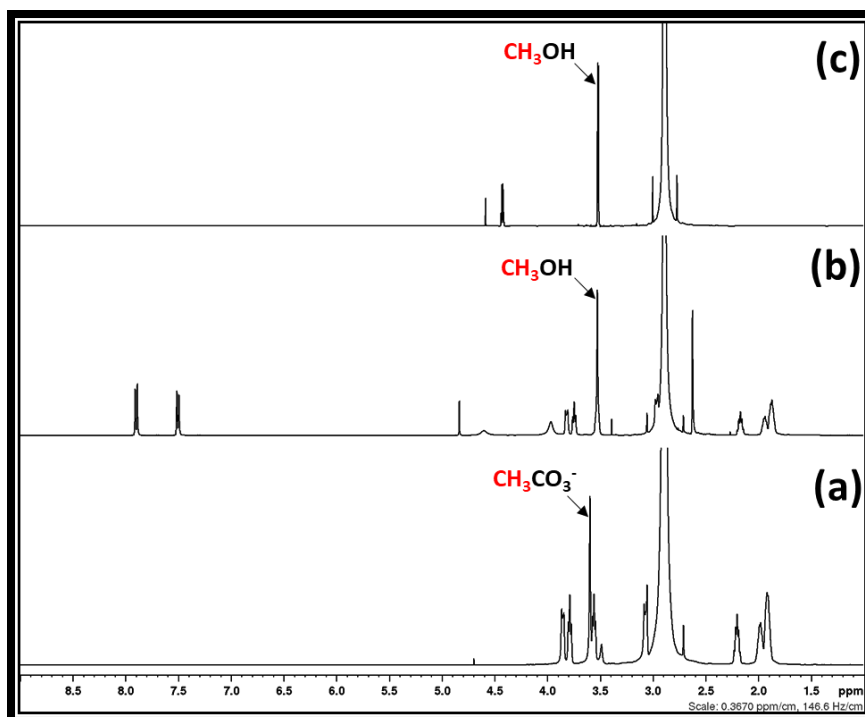

**Figure S5.**  $^1\text{H}$  NMR spectra of the reaction mixture (a) containing  $[\text{DBUH}][\text{CH}_3\text{CO}_3]$  in DMSO and (b) after addition of *p*-toluene sulfonic acid in DMSO solution of  $[\text{DBUH}][\text{CH}_3\text{CO}_3]$  (NMR analysis with  $\text{D}_2\text{O}$  capillary), and (c) methanol in DMSO (NMR analysis with  $\text{D}_2\text{O}$  capillary).

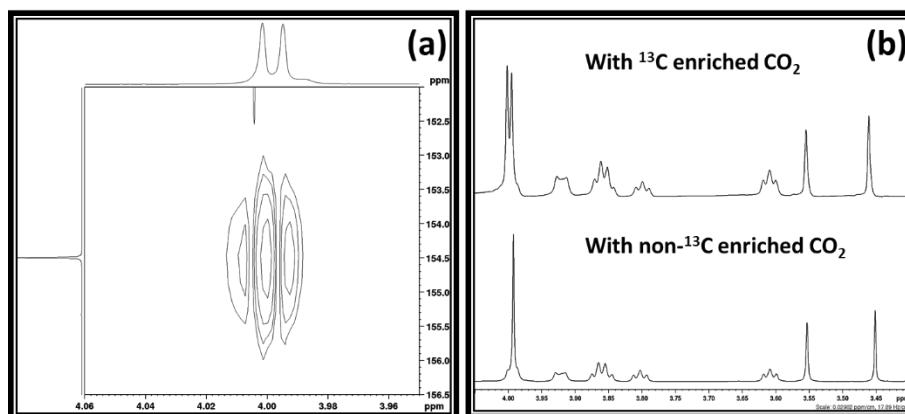

**Figure S6.** (a)  $^1\text{H}$ - $^{13}\text{C}$  HMBC spectra of the reaction mixture after addition of 1 eq. of  $\text{CH}_3\text{I}$  in DMSO solution of  $[\text{DBUH}][\text{CH}_3^{13}\text{CO}_3]$  and (b)  $^1\text{H}$  NMR spectra of the reaction mixtures where 'normal' and  $^{13}\text{C}$ -enriched  $\text{CO}_2$  were used (NMR analysis with  $\text{D}_2\text{O}$  capillary).

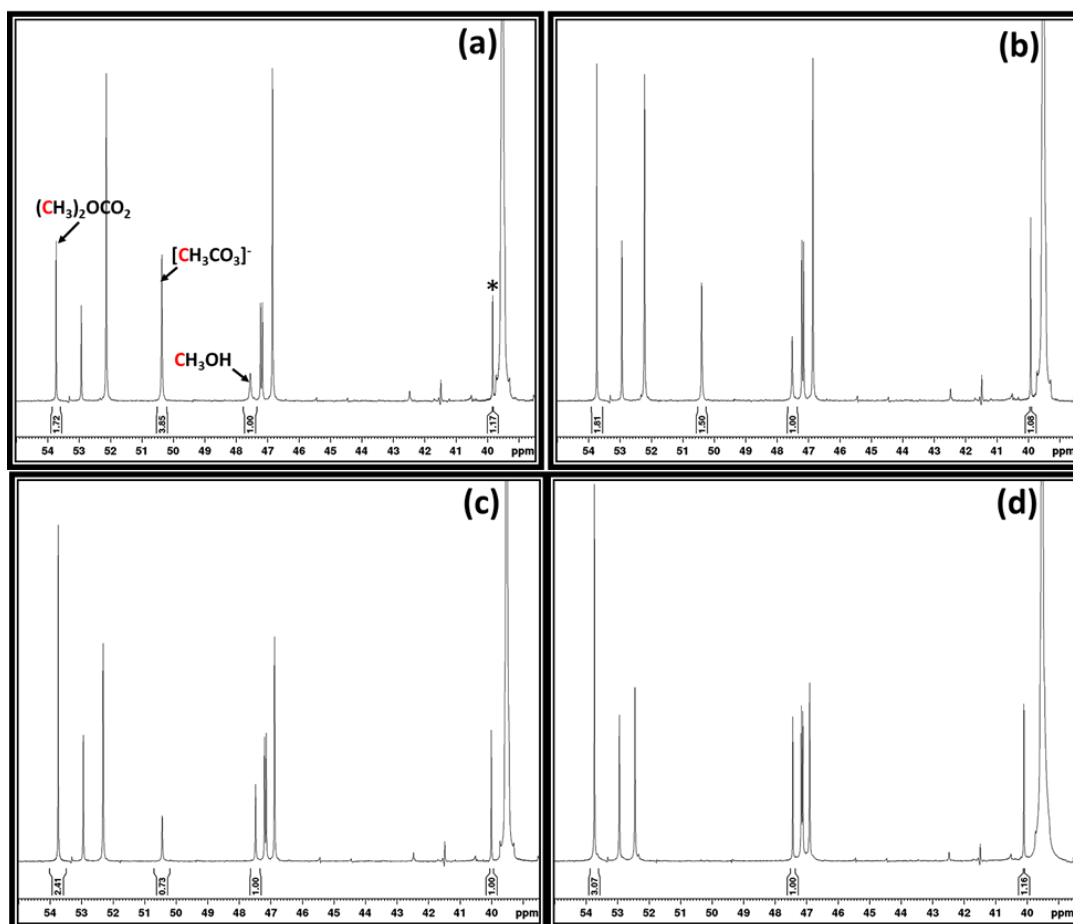

**Figure S7.** Integration of characteristic peaks in the  $^{13}\text{C}$  NMR spectra of the reaction mixture after addition of different equivalents of  $\text{CH}_3\text{I}$  in DMSO solution of  $[\text{DBUH}][\text{CH}_3\text{CO}_3]$  (a) 0.25, (b) 0.50, (c) 0.75, and 1 eq. of  $\text{CH}_3\text{I}$  (NMR analysis with  $\text{D}_2\text{O}$  capillary).

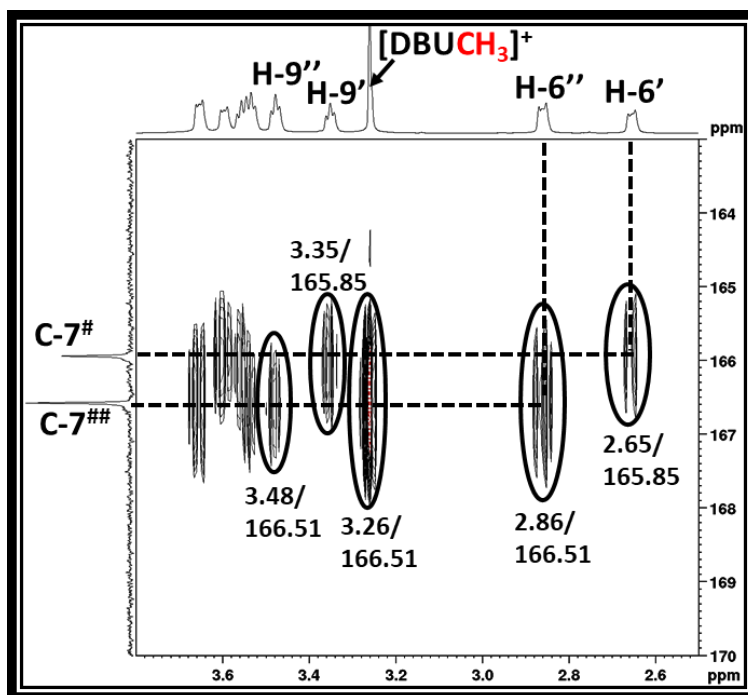

**Figure S8.**  $^1\text{H}$ - $^{13}\text{C}$  HMBC spectra of recovered DBU salts,  $[\text{DBUH}][\text{I}]$  and  $[\text{DBUCH}_3][\text{I}]$  (NMR analysis with  $\text{D}_2\text{O}$ . As the neat  $\text{D}_2\text{O}$  used for analysis, the mentioned chemical shifts values are different compared to the values obtained when  $\text{D}_2\text{O}$  capillary used during analysis.).

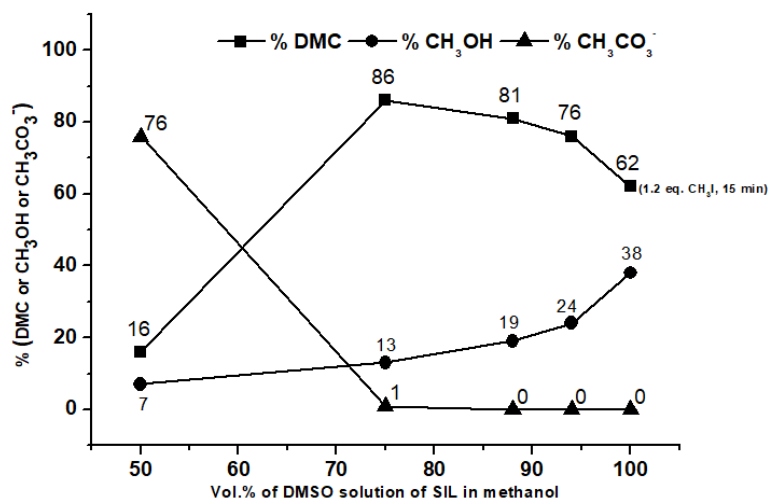

**Figure S9.** Amounts (%) of DMC,  $\text{CH}_3\text{OH}$ , and  $\text{CH}_3\text{CO}_3^-$  anions in the reaction mixture containing different amounts of methanol or DMSO solution of SIL; 3 eq. of  $\text{CH}_3\text{I}$  was added (based on the amounts of DBU), 1h of reaction time.

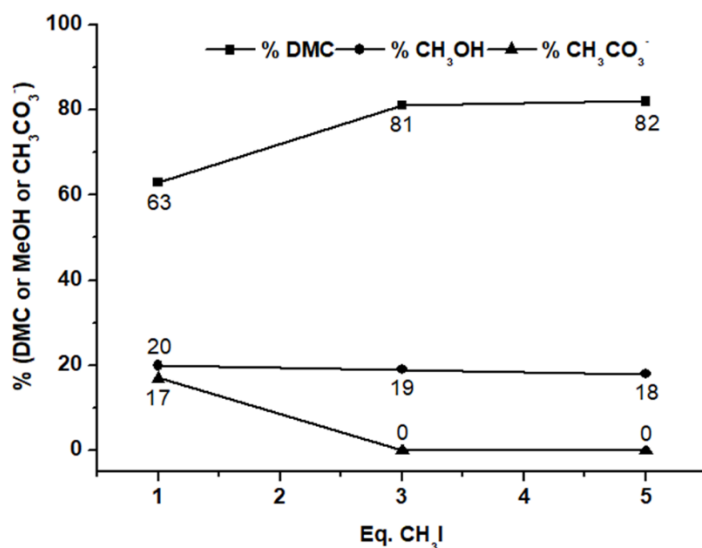

**Figure S10.** Amounts (%) of DMC,  $\text{CH}_3\text{OH}$ , and  $[\text{CH}_3\text{CO}_3]^-$  anions in the reaction mixture after addition of different amounts of  $\text{CH}_3\text{I}$  (1, 2, and 5 eq. based on amount of DBU). The reaction performed with 12 vol.% of methanol with 88 vol.% of SIL in DMSO for 1h.

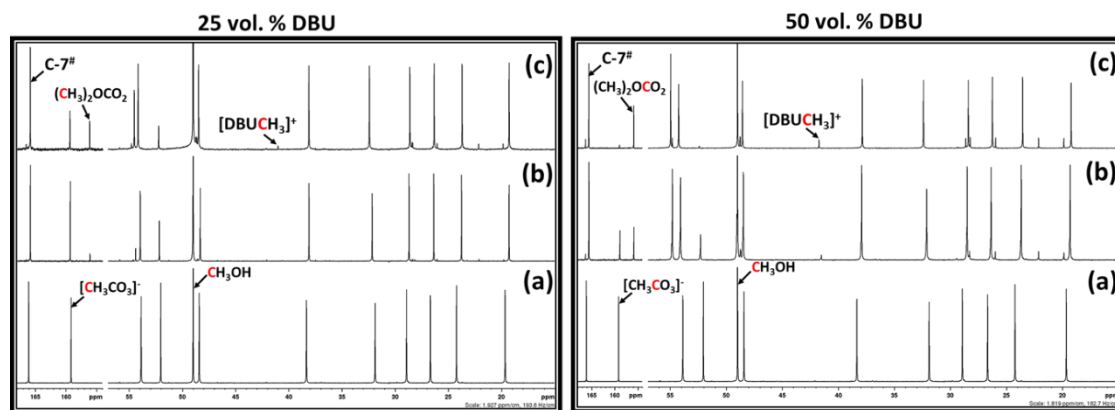

**Figure S11.**  $^{13}\text{C}$  NMR spectra of the reaction mixture for the different reaction times after addition of 3 eq. of  $\text{CH}_3\text{I}$  (based on amount of DBU) in the solution of SIL ( $[\text{DBUH}][\text{CH}_3\text{CO}_3]$ ) in methanol. The 25 or 50 vol.% of DBU in methanol was taken during SIL synthesis, (a) 0 h (only SIL in methanol), (b) 1h, and (c) 5h (NMR analysis with  $\text{D}_2\text{O}$  capillary).

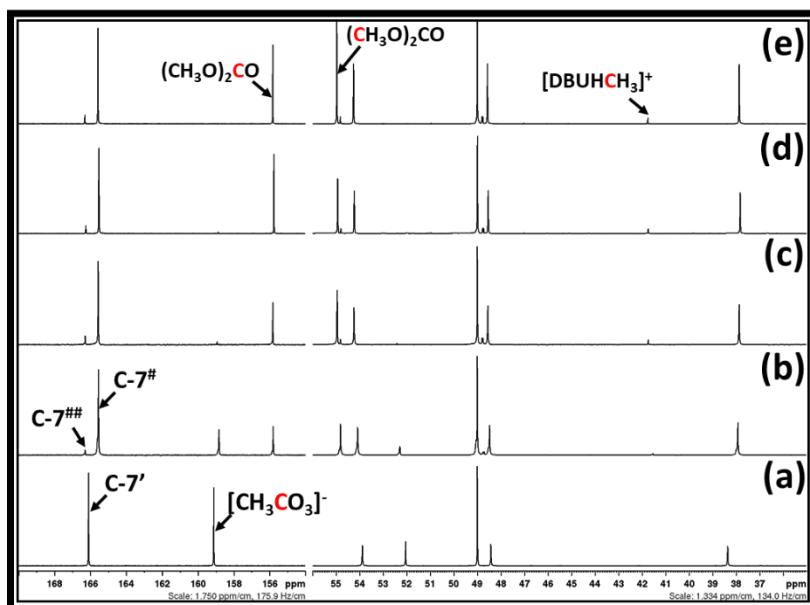

**Figure S12.**  $^{13}\text{C}$  NMR spectra for the synthesis of DMC in reaction mixtures with 50 vol.% of DBU in alcoholic solution with different reaction times: (a) 0 h (only SIL in methanol), (b) 1h, (c) 5h, (d) 7h, and (e) 10h; 3 eq. of  $\text{CH}_3\text{I}$  was added (NMR analysis with  $\text{D}_2\text{O}$  capillary).

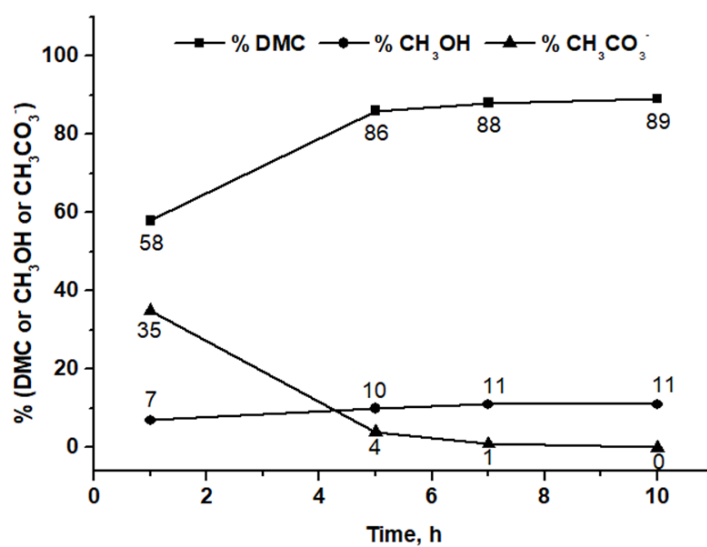

**Figure S13.** Amounts of DMC, methanol, and [CH<sub>3</sub>CO<sub>3</sub><sup>-</sup>] anions formed in the reaction mixture with different reaction times with reaction composition having 50 vol.% of DBU in alcoholic solution; 3 eq. of CH<sub>3</sub>I was added.

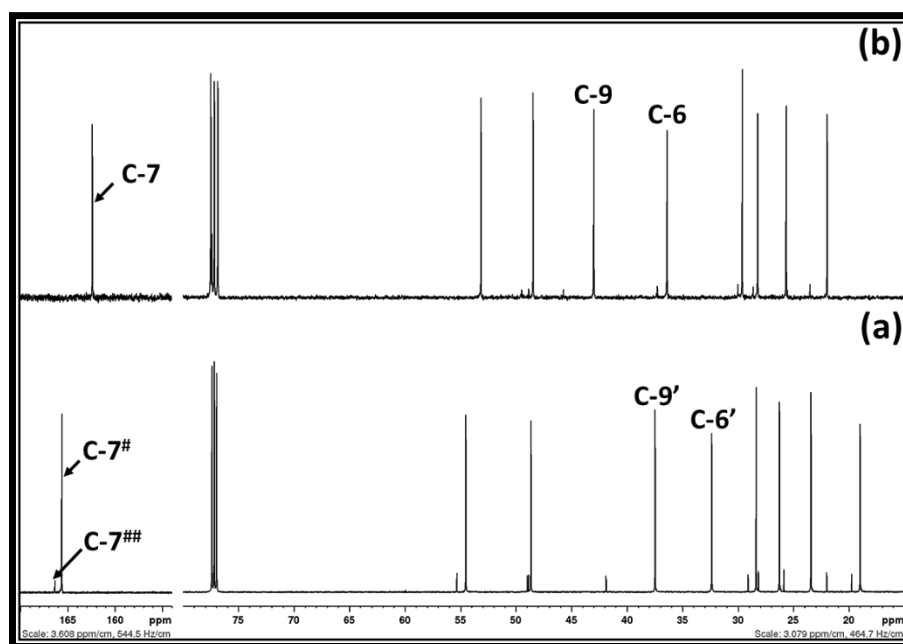

**Figure S14.** <sup>13</sup>C NMR spectra of the (a) recovered DBU salts, [DBUH][I] and [DBUCH<sub>3</sub>][I], and (b) recovered DBU (NMR analysis with CDCl<sub>3</sub>).
